# Supplementary material for: Nectin-4 as a Predictive Marker for Poor Prognosis of Endometrial Cancer with Mismatch Repair Impairment
Source: MDPI journal article supplement (doi:10.3390/cancers15102865), 2023-05-22
Supplement: s1 [file s1]

## Supplementary Materials

### Nectin-4 as a predictive marker for poor prognosis of endometrial cancer with mismatch repair impairment

Ha Kyun Chang, Young Hoon Park, Jung-A Choi\*, Jeong Won Kim, Jisup Kim, Hyo Sun Kim, Hae Nam Lee, Hanbyoul Cho, Joon-Yong Chung, and Jae-Hoon Kim\*

**Figure S1. Alteration frequency of ERBB2 and ERBB3 is associated with Nectin-4 expression in endometrial cancer.** (A) Gene alteration frequency of ERBB proteins in TCGA PanCancer Atlas Studies was analyzed using the cBioPortal tool. (B) Correlation between mRNA expression of Nectin-4 and ERBBs in endometrial cancer tumors from TCGA PanCancer Atlas Studies using the cBioPortal tool. The expression value is presented as the Z-score fold-change RNA-seq expression (v2 RSEM). The Spearman's correlation rank for each comparison is shown, and significance is shown using a *p*-value.

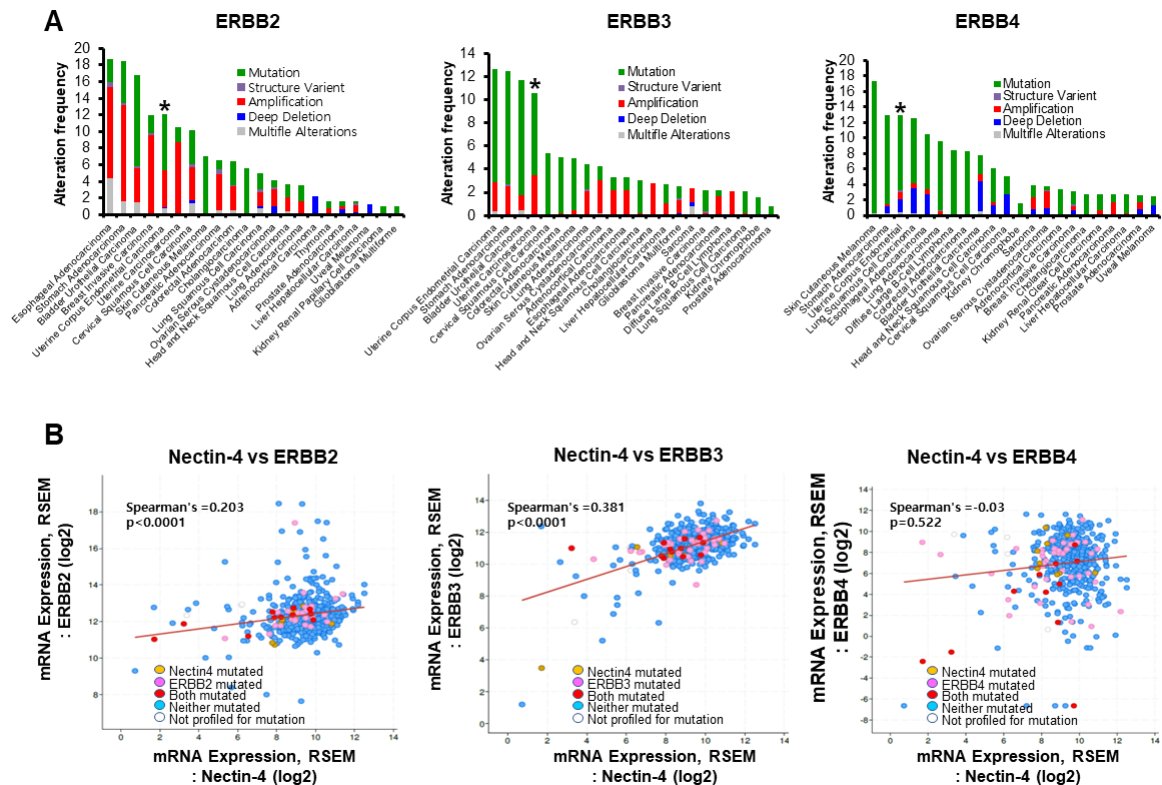

**Table S1. Inclusion and exclusion criteria for the retrospective study.**

|                    |                                                                                                                                                                                                                                                                                                                                                                                            |
|--------------------|--------------------------------------------------------------------------------------------------------------------------------------------------------------------------------------------------------------------------------------------------------------------------------------------------------------------------------------------------------------------------------------------|
| Inclusion criteria | <ol style="list-style-type: none"> <li>1. Patients diagnosed with endometrial cancer or benign tumor from January 2005 to November 2021</li> <li>2. Patients <math>\geq 19</math> years old</li> <li>3. Subjects who have agreed to provide tissues to the human material bank during surgery and biopsy to be performed for the purpose of treatment and diagnosis</li> </ol>             |
| Exclusion criteria | <ol style="list-style-type: none"> <li>1. History of infections or other serious medical problems that impair the patient's function and make protocol compliance difficult.</li> <li>2. Patients judged by the investigator that they should not participate in the clinical trial because they will not be able to comply with the clinical trial procedures and requirements</li> </ol> |

**Table S2. Ratio of groups of Nectin-4<sup>High</sup> and Nectin-4<sup>Low</sup> in CD8-positive patients with MSH-deficient endometrial cancer.**

| Groups          |                          | % of CD8-positive patients |       |
|-----------------|--------------------------|----------------------------|-------|
|                 |                          | Ratio (n)                  | Total |
| MSH2-deficient  | Nectin-4 <sup>High</sup> | 16.7% (1)                  | 6     |
|                 | Nectin-4 <sup>Low</sup>  | 83.3% (5)                  |       |
| MSH2-proficient | Nectin-4 <sup>High</sup> | 78.9% (30)                 | 38    |
|                 | Nectin-4 <sup>Low</sup>  | 21.1% (8)                  |       |
| MSH6-deficient  | Nectin-4 <sup>High</sup> | 25% (2)                    | 8     |
|                 | Nectin-4 <sup>Low</sup>  | 75.0% (6)                  |       |
| MSH6-proficient | Nectin-4 <sup>High</sup> | 80.6% (29)                 | 36    |
|                 | Nectin-4 <sup>Low</sup>  | 19.4% (7)                  |       |
